# Supplementary material for: V-ATPase/TORC1-mediated ATFS-1 translation directs mitochondrial UPR activation in C. elegans
Source: PubMed Central journal article supplement (PMC9623136; doi:10.1083/jcb.202205045), 2022-10-31

## SourceData F3

Fig. 3A

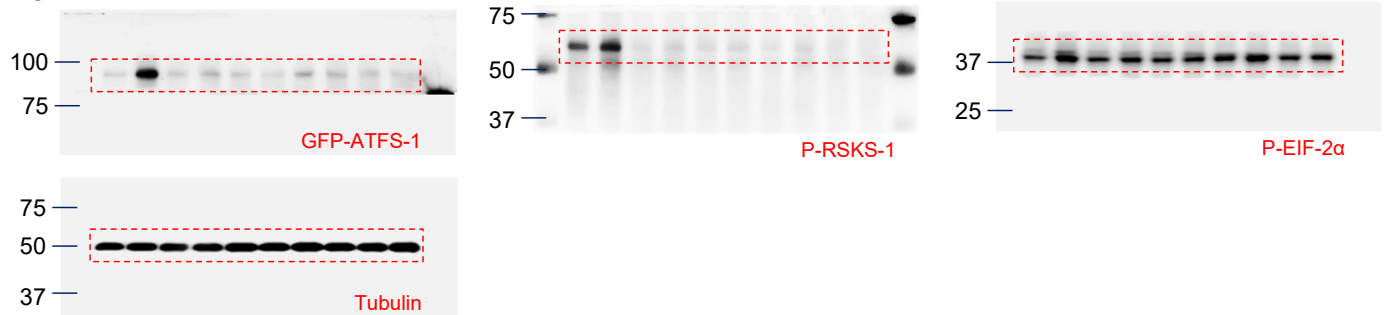

Fig. 3D

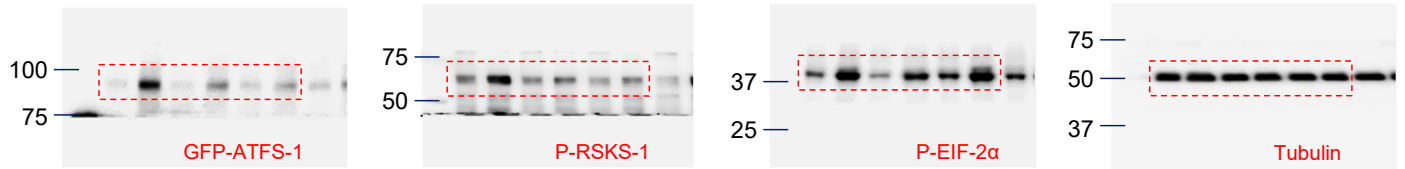

Fig. 3F

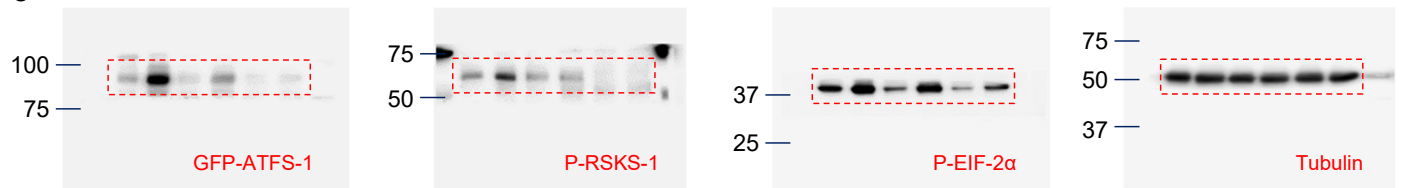

Fig. 3H

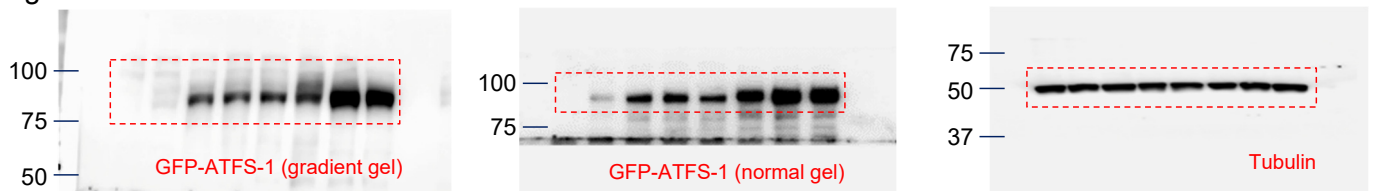

Fig. 3J

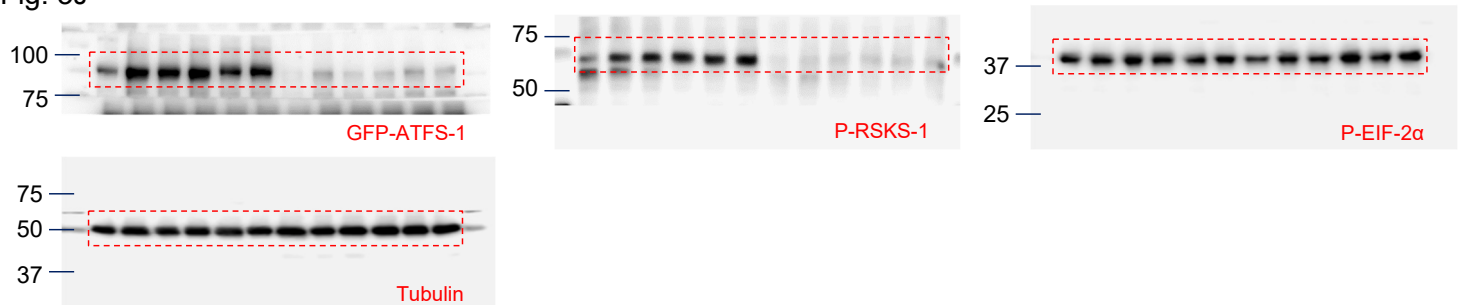

Supplement: JCB_202205045_SourceDataF3.pdf [file JCB_202205045_SourceDataF3.pdf]
