# Supplementary material for: V-ATPase/TORC1-mediated ATFS-1 translation directs mitochondrial UPR activation in C. elegans
Source: PubMed Central journal article supplement (PMC9623136; doi:10.1083/jcb.202205045), 2022-10-31

# SourceData F4

Fig. 4B

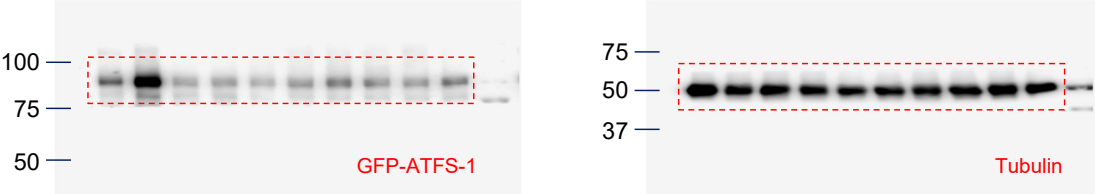

Fig. 4D

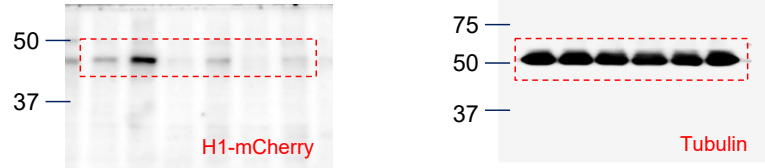

Fig. 4E

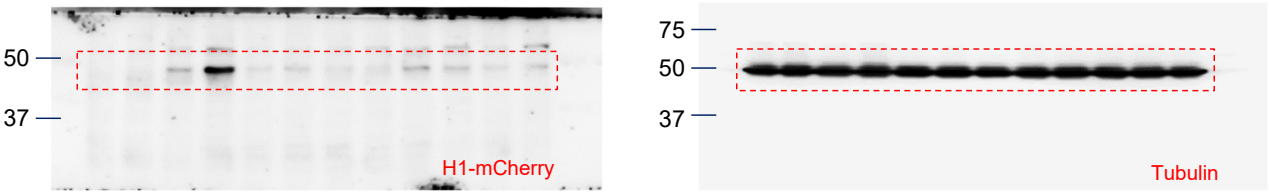

Fig. 4F

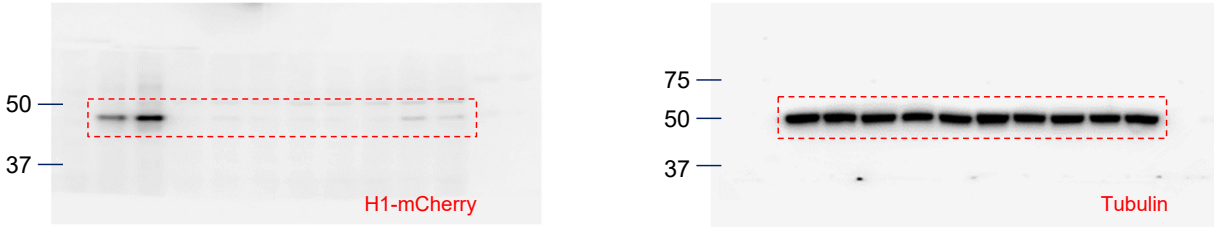

Supplement: JCB_202205045_SourceDataF4.pdf [file JCB_202205045_SourceDataF4.pdf]
