# Supplementary material for: V-ATPase/TORC1-mediated ATFS-1 translation directs mitochondrial UPR activation in C. elegans
Source: PubMed Central journal article supplement (PMC9623136; doi:10.1083/jcb.202205045), 2022-10-31

## SourceData F5

Fig. 5B

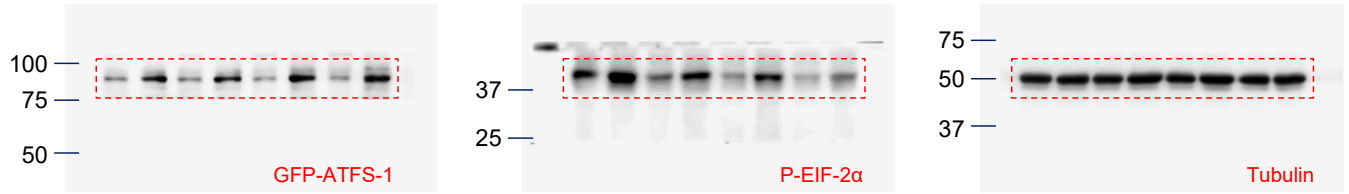

Fig. 5C

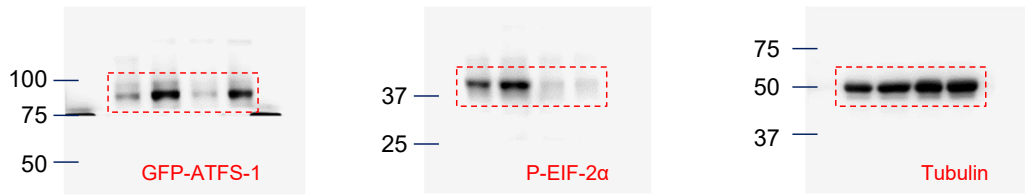

Fig. 5D

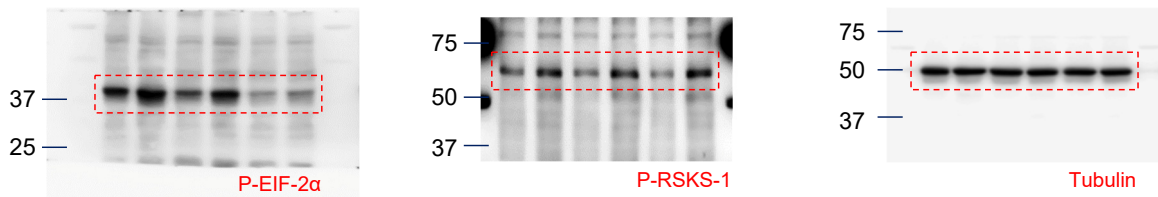

Fig. 5E

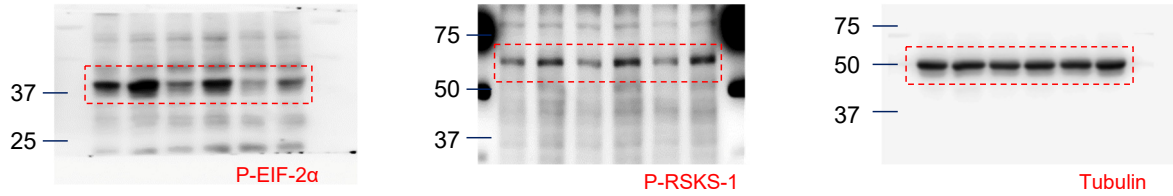

Supplement: JCB_202205045_SourceDataF5.pdf [file JCB_202205045_SourceDataF5.pdf]
