# Supplementary material for: V-ATPase/TORC1-mediated ATFS-1 translation directs mitochondrial UPR activation in C. elegans
Source: PubMed Central journal article supplement (PMC9623136; doi:10.1083/jcb.202205045), 2022-10-31

## SourceData FS2

Fig. S2A

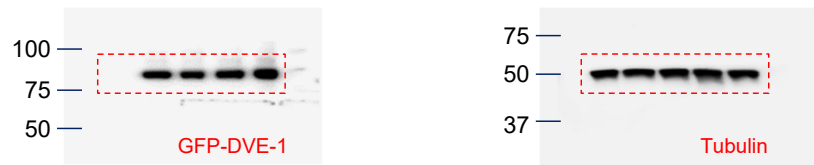

Fig. S2B

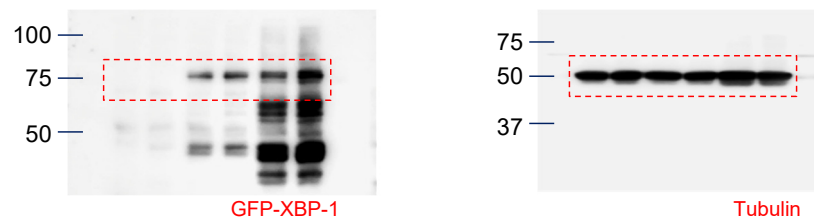

Fig. S2E

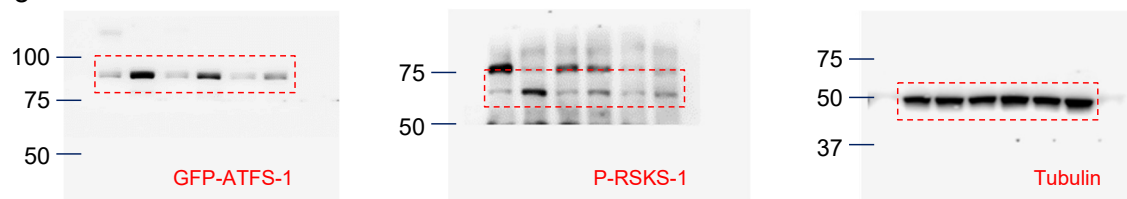

Fig. S2I

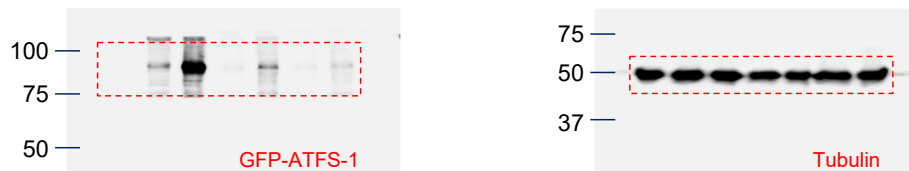

Supplement: JCB_202205045_SourceDataFS2.pdf [file JCB_202205045_SourceDataFS2.pdf]
